# Supplementary material for: The Gray Area of Freezing of Gait Annotation: A Guideline and Open‐Source Practical Tool
Source: PubMed Central journal article supplement (PMC9631855; doi:10.1002/mdc3.13556), 2022-09-18
Supplement: MDC3-9-1099-s001.pdf [file MDC3-9-1099-s001.pdf]

# Supplementary material

## Supplementary table 1

Formulas for the reliability and agreement parameters

|         |        |         |        |
|---------|--------|---------|--------|
|         |        | rater 2 |        |
|         |        | FOG     | no FOG |
| rater 1 | FOG    | a       | b      |
|         | no FOG | c       | d      |

$$n = a + b + c + d \quad (1)$$

Where  $a$  and  $d$  are respectively defined as the total duration of overlapping areas that are definitely considered as freezing ( $a$ , black areas), or no freezing ( $d$ , white areas);  $b$  and  $c$  are defined as the total duration of non-overlapping FOG episodes (grey areas); and  $n$  is defined as the total duration of gait tasks considered for FOG assessment.

### Interrater reliability (15, 16)

Different formulas exist, depending on the context, see (18) or (20).

### Cohen's kappa (14)

$$\kappa = \frac{p_o - p_c}{1 - p_c} \quad (2)$$

Where  $\kappa$  is the Cohen's kappa,  $p_o$  the proportion of observed agreement, and  $p_c$  the proportion of agreement expected by chance.  $p_o$  and  $p_c$  are respectively defined as:

$$p_o = \frac{(a + d)}{n} \quad (3)$$

$$p_c = \frac{\frac{(a + c)(a + b)}{n} + \frac{(b + d)(c + d)}{n}}{n} \quad (4)$$

### Positive agreement (15)

$$positive\ agreement = \frac{2a}{n + (a - d)} \quad (5)$$

**Negative agreement (15)**

$$\text{negative agreement} = \frac{2d}{n - (a - d)} \quad (6)$$

**Prevalence index (14)**

$$\text{prevalence index} = \frac{a - d}{n} \quad (7)$$

**REFERENCES**

*The reference numbers of the main text were used.*

14. Sim J, Wright CC. The Kappa Statistic in Reliability Studies: Use, Interpretation, and Sample Size Requirements. *Physical Therapy*. 2005;85(3):257-68.
15. Cicchetti DV, Feinstein AR. High agreement but low kappa: II. Resolving the paradoxes. *J Clin Epidemiol*. 1990;43(6):551-8.
16. Gisev N, Bell JS, Chen TF. Interrater agreement and interrater reliability: key concepts, approaches, and applications. *Res Social Adm Pharm*. 2013;9(3):330-8.
18. McGraw KO, Wong SP. Forming inferences about some intraclass correlation coefficients. *Psychological Methods*. 1996;1(1):30-46.
20. Shrout PEF, Josep L. Intraclass Correlations: Uses in Assising Rater Reliability. *Psychological Bulletin*, 1979; 86.
